# Supplementary material for: Im Notfall gleicher?
Source: Springer Nature journal article supplement (doi:10.1007/s41906-023-2088-4), 2023-05-16
Supplement: MOESM1 [file 25370960]

## Literatur

### zum Beitrag „Im Notfall gleicher?“

von Joachim Graf, Patricia Graf und Harald Abele

*PflegeZeitschrift* (76) 6/2023, S. 37-38

Bensing, J.M., Kerssens, J.J. & van der Pasch, M. (2005). Patient-directed gaze as a tool for discovering and handling psychosocial problems in general practice. *J Nonverbal Behav*, 19, 223–42.

Borkhoff, C. M., Hawker, G. A., Kreder, H. J., Glazier, R. H., Mahomed, N. N., & Wright, J. G. (2008). The effect of patients' sex on physicians' recommendations for total knee arthroplasty. *CMAJ : Canadian Medical Association journal = journal de l'Association medicale canadienne*, 178(6), 681–687. <https://doi.org/10.1503/cmaj.071168>

Chang, C.-H. & Yang, F. (2021). How Gender Stereotypes Impact Health Information Seeking Intention: Insights from an Implicit Association Test. *Cogent Social Sciences*, 7:1, DOI: 10.1080/23311886.2021.1999614

Chen, E. H., Shofer, F. S., Dean, A. J., Hollander, J. E., Baxt, W. G., Robey, J. L., Sease, K. L., & Mills, A. M. (2008). Gender disparity in analgesic treatment of emergency department patients with acute abdominal pain. *Academic emergency medicine: official journal of the Society for Academic Emergency Medicine*, 15(5), 414–418. <https://doi.org/10.1111/j.1553-2712.2008.00100.x>

Eckes, T. (2008). Geschlechterstereotype: Von Rollen, Identitäten und Vorurteilen. In: Becker, R. & Kortendiek, B. (Hrsg.). *Handbuch Frauen- und Geschlechterforschung* (S. 171–182). Wiesbaden: VS Verlag für Sozialwissenschaften. [https://doi.org/10.1007/978-3-531-91972-0\\_20](https://doi.org/10.1007/978-3-531-91972-0_20)

Feykes, C. E. (2021). Geschlechterstereotype im Rettungsdienst: Resultate einer empirischen Erhebung. *Rettungsdienst*, 44(11), 30-36.

Gomez, D., Haas, B., de Mestral, C., Sharma, S., Hsiao, M., Zagorski, B., Rubinfeld, G., Ray, J., & Nathens, A. B. (2012). Gender-associated differences in access to trauma center care: A population-based analysis. *Surgery*, 152(2), 179–185. <https://doi.org/10.1016/j.surg.2012.04.006>

Graf, J., Smolka, R., Simoes, E., Zipfel, S., Junne, F., Holderried, F., Wosnik, A., Doherty, A. M., Menzel, K., & Herrmann-Werner, A. (2017). Communication skills of medical students during the OSCE: Gender-specific differences in a longitudinal trend study. *BMC medical education*, 17(1), 75. <https://doi.org/10.1186/s12909-017-0913-4>

Kaempfer, A., Ranke, Ch., Riemer, M. & Tchirikov, T. (2022). Gendersensible Geburtshilfe – Fallbeispiel einer gesellschaftlichen Entwicklung. *Geburtshilfe Frauenheilkd*, 82(06): e17 DOI: 10.1055/s-0042-1749711

Ketepe-Arachi, T., & Sharma, S. (2017). Cardiovascular Disease in Women: Understanding Symptoms and Risk Factors. *European cardiology*, 12(1), 10–13. <https://doi.org/10.15420/ecr.2016:32:1>

Klimmer, M.M. (2021). Der Mann als Goldstandard? Gendereffekte in Medizin und Unfallforschung. *Rettungsdienst*, 44(11), 12-18.

Macrae, C. N., Milne, A. B., & Bodenhausen, G. V. (1994). Stereotypes as energy-saving devices: A peek inside the cognitive toolbox. *Journal of Personality and Social Psychology*, 66(1), 37–47. <https://doi.org/10.1037/0022-3514.66.1.37>

Melberg, T., Kindervaag, B., & Rosland, J. (2013). Gender-specific ambulance priority and delays to primary percutaneous coronary intervention: a consequence of the patients' presentation or the management at the emergency medical communications center?. *American heart journal*, 166(5), 839–845. <https://doi.org/10.1016/j.ahj.2013.07.034>

Michael, M., Al Agha, S., Böhm, L. et al. Alters- und geschlechtsbezogene Verteilung von Zuführung, Ersteinschätzung, Entlassart und Verweildauer in der zentralen Notaufnahme. *Notfall Rettungsmed*, 26, 39–48 (2023). <https://doi.org/10.1007/s10049-021-00895-9>

Nutbeam, T., Weekes, L., Heidari, S., Fenwick, R., Bouamra, O., Smith, J., & Stassen, W. (2022). Sex-disaggregated analysis of the injury patterns, outcome data and trapped status of major trauma patients injured in motor vehicle collisions: a prespecified analysis of the UK trauma registry (TARN). *BMJ open*, 12(5), e061076. <https://doi.org/10.1136/bmjopen-2022-061076>

Roter, D.L., Hall, J.A. & Aoki, Y. (2002). Physician gender effects in medical communication. A meta-analytic review. *JAMA*, 288(6), 756-764.

Rubenson Wahlin, R., Ponzer, S., Lövbrand, H. et al. (2016). Do male and female trauma patients receive the same prehospital care?: an observational follow-up study. *BMC Emerg Med* 16, 6. <https://doi.org/10.1186/s12873-016-0070-9>

Schoeneberg, C., Kauther, M. D., Hussmann, B., Keitel, J., Schmitz, D., & Lendemans, S. (2013). Gender-specific differences in severely injured patients between 2002 and 2011: data analysis with matched-pair analysis. *Critical care (London, England)*, 17(6), R277. <https://doi.org/10.1186/cc13132>

Sederholm Lawesson, S., Isaksson, R. M., Ericsson, M., Ängerud, K., Thylén, I., & SymTime Study Group (2018). Gender disparities in first medical contact and delay in ST-elevation myocardial infarction: a prospective multicentre Swedish survey study. *BMJ open*, 8(5), e020211. <https://doi.org/10.1136/bmjopen-2017-020211>

Sieverding, M. & Kendel, F. Geschlechter(rollen)aspekte in der Arzt-Patient-Interaktion. *Bundesgesundheitsbl*, 55, 1118–1124 (2012). <https://doi.org/10.1007/s00103-012-1543-y>

Stommel, W., Plug, I., Olde Hartman, T. C., Lucassen, P. L. B. J., van Dulmen, S., & Das, E. (2022). Gender stereotyping in medical interaction: A Membership Categorization Analysis. *Patient education and counseling*, 105(11), 3242–3248. <https://doi.org/10.1016/j.pec.2022.07.018>
